# Supplementary material for: Measuring Japanese mothers' perception of child abuse: development of a Japanese version of the child abuse blame scale – physical abuse (CABS-PA-J)
Source: Biopsychosoc Med. 2007 Jul 10;1:14. doi: 10.1186/1751-0759-1-14 (PMC1950522; doi:10.1186/1751-0759-1-14)
Supplement: Additional file 3 — Table 3, Correlation between CABS-PA-J subscales and social support or abusive behavior. [file 1751-0759-1-14-S3.xls]

## Sheet: T３
		Table3. Correlation between CABS-PA-J subscales and social support or abusive behavior
		Factors	Social support					Abusive behavior
			Suport1		Suport2		Phｙsical		Psychological		Neglect		Total score
			r		r		r		r		r		r
			P		P		P		P		P		P
			N		N		N		N		N		N
		Child victim	-.27	**	-.27	**	.16	†	.26	**	.08		.20	*
			.00		.00		.05		.00		.31		.01
			140		130		149		150		150		149
		Societal	-.03		.07		-.04		-.12		-.10		-.08
			.70		.43		.63		.15		.24		.35
			140		130		149		150		150		149
		Situational	-.05		.10		.05		.12		-.07		.06
			.58		.26		.51		.14		.37		.50
			140		130		149		150		150		149
		Preserver-perpetrator	.02		-.10		.10		.15		-.01		.11
			.58		.26		.51		.14		.37		.50
			140		130		149		150		150		149
		Total score	-.17	*	-.11		.13		.20	*	-.03		.14	†
			.04		.20		.10		.01		.69		.08
			140		130		149		150		150		149
		Note:	Suport1 ： spouse									**	p < .01
			Suport2 ： other person									*	p < .05
												†	p < .10
